# Supplementary material for: Characteristics of Volatile Organic Compounds Emitted from Airport Sources and Their Effects on Ozone Production
Source: MDPI journal article supplement (doi:10.3390/toxics12040243), 2024-03-26
Supplement: s1 [file s1]

## **Appendix A. Supplementary data for “Characteristics of volatile organic compounds emitted from airport sources and their effects on ozone”**

Mubai Chen<sup>1</sup>, Shiping Li<sup>2</sup>, Long Yun<sup>2</sup>, Yongjiang Xu<sup>1</sup>, Daiwei Chen<sup>1</sup>, Chuxiong Lin<sup>2</sup>, Zhicheng Qiu<sup>2</sup>, Yinong You<sup>1</sup>, Ming Liu<sup>3</sup>, Zhenrong Luo<sup>3</sup>, Liyun Zhang<sup>3</sup>, Chunlei Cheng<sup>1,4\*</sup>, Mei Li<sup>1,4\*</sup>

<sup>1</sup>Institute of Mass Spectrometry and Atmospheric Environment, Guangdong Provincial Engineering Research Center for Online Source Apportionment System of Air Pollution, Jinan University, Guangzhou 510632, China

<sup>2</sup>Shenzhen Ecological and Environmental Monitoring Center of Guangdong Province, Shenzhen 518049, China

<sup>3</sup>Guangzhou Hexin Instrument Co., Ltd, Guangzhou 510530, China

<sup>4</sup>Guangdong-Hongkong-Macau Joint Laboratory of Collaborative Innovation for Environmental Quality, Guangzhou 510632, China

\*Correspondence to: Chunlei Cheng (chengcl.vip@foxmail.com) and Mei Li (limei2007@163.com)

Tel: 86-20-85225991, Fax: 86-20-85225991

**Table S1. All species measured by GC-MS/FID and HPLC.**

| No. | Species                                | No. | Species                    | No. | Species                      | No. | Species                              |
|-----|----------------------------------------|-----|----------------------------|-----|------------------------------|-----|--------------------------------------|
| 1   | Ethane                                 | 33  | Carbon disulfide           | 65  | Crotonaldehyde               | 97  | 1-Ethyl-3-methylbenzene              |
| 2   | Ethylene                               | 34  | Isopropyl alcohol          | 66  | Trichlorethylene             | 98  | p-Ethyltoluene                       |
| 3   | Propane                                | 35  | Dichloromethane            | 67  | Methylcyclohexane            | 99  | 1,3,5-Trimethylbenzene               |
| 4   | Difluorodichloromethane                | 36  | 2,3-Dimethylbutane         | 68  | 1,2-Dichloropropane          | 100 | Decane                               |
| 5   | Acrylic                                | 37  | 2-Methylpentane            | 69  | Valeraldehyde                | 101 | 1-Ethyl-2-methylbenzene              |
| 6   | Isobutane                              | 38  | Cyclopentane               | 70  | Methyl methacrylate          | 102 | Benzaldehyde                         |
| 7   | n-Butane                               | 39  | trans-1,2-Dichloroethylene | 71  | 1,4-Dioxane                  | 103 | 1,2,4-Trimethylbenzene               |
| 8   | Acetylene                              | 40  | 3-Methylpentane            | 72  | Bromodichloromethane         | 104 | 1,3-Dichlorobenzene                  |
| 9   | trans-2-Butene                         | 41  | Methyl tert-butyl ether    | 73  | 2,3,4-Trimethylpentane       | 105 | p-Dichlorobenzene                    |
| 10  | cis-2-Butene                           | 42  | 1-Hexene                   | 74  | 2-Methylheptane              | 106 | 1,2,3-Trimethylbenzene               |
| 11  | n-Butene                               | 43  | n-Hexane                   | 75  | trans-1,3-Dichloro-1-propene | 107 | Chlorotoluene                        |
| 12  | 1,1,2,2-Tetrafluoro-1,2-dichloroethane | 44  | Methacrolein               | 76  | 3-Methylheptane              | 108 | 1,3-Diethylbenzene                   |
| 13  | Methyl chloride                        | 45  | 1,1-Dichloroethane         | 77  | 4-Methyl-2-pentanone         | 109 | o-Dichlorobenzene                    |
| 14  | Vinyl chloride                         | 46  | Vinyl acetate              | 78  | Toluene                      | 110 | p-Diethylbenzene                     |
| 15  | Butadiene                              | 47  | 2,4-Dimethylpentane        | 79  | n-Octane                     | 111 | Undecane                             |
| 16  | Acetaldehyde                           | 48  | n-Butyraldehyde            | 80  | cis-1,3-Dichloro-1-propene   | 112 | 3-Methylbenzaldehyde                 |
| 17  | Methyl bromide                         | 49  | Methylcyclopentane         | 81  | 1,1,2-Trichloroethane        | 113 | Dodecane                             |
| 18  | Ethyl chloride                         | 50  | cis-1,2-dichloroethylene   | 82  | Tetrachlorethylene           | 114 | 1,2,4-Trichlorobenzene               |
| 19  | Isopentane                             | 51  | 2-Butanone                 | 83  | 2-Hexanone                   | 115 | 1,1,2,3,4,4-Hexachloro-1,3-butadiene |
| 20  | Mono-fluoro-trichloromethane           | 52  | Ethyl acetate              | 84  | Dibromochloromethane         | 116 | Naphthalene                          |

| No. | Species                               | No. | Species                | No. | Species                     | No. | Species                          |
|-----|---------------------------------------|-----|------------------------|-----|-----------------------------|-----|----------------------------------|
| 21  | 1-Pentene                             | 53  | Chloroform             | 85  | Hexanal                     | 117 | Formaldehyde                     |
| 22  | n-Pentane                             | 54  | Tetrahydrofuran        | 86  | 1,2-Dibromoethane           | 118 | Glyoxal                          |
| 23  | trans-2-Pentene                       | 55  | 1,1,1-Trichloroethane  | 87  | Chlorobenzene               | 119 | Cyclohexanone                    |
| 24  | Isoprene                              | 56  | 2-Methylhexane         | 88  | Ethylbenzene                | 120 | Isovaleraldehyde                 |
| 25  | cis-2-Pentene                         | 57  | Cyclohexane            | 89  | m/p-Xylene                  | 121 | p-Methylbenzaldehyde             |
| 26  | Ethanol                               | 58  | 2,3-Dimethylpentane    | 90  | n-Nonane                    | 122 | Methylglyoxal<br>(Pyruvaldehyde) |
| 27  | Acrolein                              | 59  | Carbon tetrachloride   | 91  | o-Xylene                    | 123 | 2,5-Dimethylbenzaldehyde         |
| 28  | Propionaldehyde                       | 60  | 3-Methylhexane         | 92  | Styrene                     | 124 | Heptanal                         |
| 29  | 1,1-Dichloroethylene                  | 61  | Benzene                | 93  | Bromoform                   | 125 | Octanal                          |
| 30  | 1,2,2-Trifluoro-1,1,2-trichloroethane | 62  | 1,2-Dichloroethane     | 94  | Cumene                      | 126 | Nonaldehyde                      |
| 31  | 2,2-Dimethylbutane                    | 63  | 2,2,4-Trimethylpentane | 95  | Symmetric tetrachloroethane | 127 | Decanal                          |
| 32  | Acetone                               | 64  | n-Heptane              | 96  | n-Propylbenzene             |     |                                  |

**Table S2. MIR values corresponding to each species**

| No. | Species                                | Chemical groups  | MIR   |
|-----|----------------------------------------|------------------|-------|
| 1   | Ethane                                 | Alkanes          | 0.32  |
| 2   | Ethylene                               | Alkenes          | 8.64  |
| 3   | Propane                                | Alkanes          | 0.56  |
| 4   | Difluorodichloromethane                | Halohydrocarbons | –     |
| 5   | Acrylic                                | Alkenes          | 10.80 |
| 6   | Isobutane                              | Alkanes          | 1.30  |
| 7   | n-Butane                               | Alkanes          | 1.33  |
| 8   | Acetylene                              | Alkynes          | 0.94  |
| 9   | trans-2-Butene                         | Alkenes          | 12.50 |
| 10  | cis-2-Butene                           | Alkenes          | 12.20 |
| 11  | n-Butene                               | Alkenes          | 9.30  |
| 12  | 1,1,2,2-Tetrafluoro-1,2-dichloroethane | Halohydrocarbons | –     |
| 13  | Methyl chloride                        | Halohydrocarbons | 0.04  |
| 14  | Vinyl Chloride                         | Halohydrocarbons | 3.19  |
| 15  | Butadiene                              | Alkenes          | 11.50 |
| 16  | Acetaldehyde                           | OVOCs            | 6.07  |
| 17  | Methyl bromide                         | Halohydrocarbons | 0.02  |
| 18  | Ethyl chloride                         | Halohydrocarbons | 0.34  |
| 19  | Isopentane                             | Alkanes          | 1.65  |
| 20  | Monofluorotrichloromethane             | Halohydrocarbons | –     |
| 21  | 1-Pentene                              | Alkenes          | 6.92  |
| 22  | n-Pentane                              | Alkanes          | 1.56  |
| 23  | trans-2-Pentene                        | Alkenes          | 9.74  |
| 24  | Isoprene                               | Alkenes          | 9.71  |
| 25  | cis-2-Pentene                          | Alkenes          | 9.62  |
| 26  | Ethanol                                | OVOCs            | 1.79  |
| 27  | Acrolein                               | OVOCs            | 6.98  |
| 28  | Propionaldehyde                        | OVOCs            | 6.78  |
| 29  | 1,1-Dichloroethylene                   | Halohydrocarbons | 2.08  |
| 30  | 1,2,2-Trifluoro-1,1,2-trichloroethane  | Halohydrocarbons | –     |
| 31  | 2,2-Dimethylbutane                     | Alkanes          | 1.30  |
| 32  | Acetone                                | OVOCs            | 0.34  |
| 33  | Carbon disulfide                       | Organic sulfur   | 0.25  |
| 34  | Isopropyl alcohol                      | OVOCs            | 0.64  |
| 35  | Dichloromethane                        | Halohydrocarbons | 0.05  |
| 36  | 2,3-Dimethylbutane                     | Alkanes          | 1.09  |
| 37  | 2-Methylpentane                        | Alkanes          | 1.77  |
| 38  | Cyclopentane                           | Alkanes          | 2.37  |
| 39  | trans-1,2-Dichloroethylene             | Halohydrocarbons | 1.80  |
| 40  | 3-Methylpentane                        | Alkanes          | 2.09  |
| 41  | Methyl tert-butyl ether                | OVOCs            | 0.79  |
| 42  | 1-Hexene                               | Alkenes          | 5.47  |
| 43  | n-Hexane                               | Alkanes          | 1.55  |

| No. | Species                      | Chemical groups  | MIR   |
|-----|------------------------------|------------------|-------|
| 44  | Methacrolein                 | OVOCs            | 5.43  |
| 45  | 1,1-Dichloroethane           | Halohydrocarbons | 0.08  |
| 46  | Vinyl acetate                | OVOCs            | 2.87  |
| 47  | 2,4-Dimethylpentane          | Alkanes          | 1.76  |
| 48  | n-Butyraldehyde              | OVOCs            | 5.73  |
| 49  | Methylcyclopentane           | Alkanes          | 2.23  |
| 50  | cis-1,2-dichloroethylene     | Halohydrocarbons | –     |
| 51  | 2-Butanone                   | OVOCs            | 1.53  |
| 52  | Ethyl acetate                | OVOCs            | 0.72  |
| 53  | Chloroform                   | Halohydrocarbons | 0.03  |
| 54  | Tetrahydrofuran              | OVOCs            | 4.77  |
| 55  | 1,1,1-Trichloroethane        | Halohydrocarbons | 0.01  |
| 56  | 2-Methylhexane               | Alkanes          | 1.57  |
| 57  | Cyclohexane                  | Alkanes          | 1.81  |
| 58  | 2,3-Dimethylpentane          | Alkanes          | 1.55  |
| 59  | Carbon tetrachloride         | Halohydrocarbons | –     |
| 60  | 3-Methylhexane               | Alkanes          | 1.91  |
| 61  | Benzene                      | Aromatics        | 0.79  |
| 62  | 1,2-Dichloroethane           | Halohydrocarbons | 0.23  |
| 63  | 2,2,4-Trimethylpentane       | Alkanes          | 1.38  |
| 64  | n-Heptane                    | Alkanes          | 1.37  |
| 65  | Crotonaldehyde               | OVOCs            | 8.18  |
| 66  | Trichlorethylene             | Halohydrocarbons | 0.75  |
| 67  | Methylcyclohexane            | Alkanes          | 1.86  |
| 68  | 1,2-Dichloropropane          | Halohydrocarbons | 0.32  |
| 69  | Valeraldehyde                | OVOCs            | 4.88  |
| 70  | Methyl methacrylate          | OVOCs            | 11.70 |
| 71  | 1,4-Dioxane                  | OVOCs            | 2.68  |
| 72  | Bromodichloromethane         | Halohydrocarbons | –     |
| 73  | 2,3,4-Trimethylpentane       | Alkanes          | 1.20  |
| 74  | 2-Methylheptane              | Alkanes          | 1.37  |
| 75  | trans-1,3-Dichloro-1-propene | Halohydrocarbons | 4.73  |
| 76  | 3-Methylheptane              | Alkanes          | 1.53  |
| 77  | 4-Methyl-2-pentanone         | OVOCs            | 3.81  |
| 78  | Toluene                      | Aromatics        | 4.02  |
| 79  | n-Octane                     | Alkanes          | 1.15  |
| 80  | cis-1,3-Dichloro-1-propene   | Halohydrocarbons | 3.66  |
| 81  | 1,1,2-Trichloroethane        | Halohydrocarbons | 0.09  |
| 82  | Tetrachlorethylene           | Halohydrocarbons | 0.04  |
| 83  | 2-Hexanone                   | OVOCs            | 3.47  |
| 84  | Dibromochloromethane         | Halohydrocarbons | –     |
| 85  | Hexanal                      | OVOCs            | 4.17  |
| 86  | 1,2-Dibromoethane            | Halohydrocarbons | 0.11  |
| 87  | Chlorobenzene                | Halohydrocarbons | 0.35  |
| 88  | Ethylbenzene                 | Aromatics        | 3.11  |

| No. | Species                              | Chemical groups  | MIR   |
|-----|--------------------------------------|------------------|-------|
| 89  | m/p-Xylene                           | Aromatics        | 6.99  |
| 90  | n-Nonane                             | Alkanes          | 1.03  |
| 91  | o-Xylene                             | Aromatics        | 7.17  |
| 92  | Styrene                              | Aromatics        | 1.70  |
| 93  | Bromoform                            | Halohydrocarbons | –     |
| 94  | Cumene                               | Aromatics        | 2.58  |
| 95  | Symmetric tetrachloroethane          | Halohydrocarbons | –     |
| 96  | n-Propylbenzene                      | Aromatics        | 2.15  |
| 97  | 1-Ethyl-3-methylbenzene              | Aromatics        | 6.70  |
| 98  | p-Ethyltoluene                       | Aromatics        | 4.28  |
| 99  | 1,3,5-Trimethylbenzene               | Aromatics        | 9.35  |
| 100 | Decane                               | Alkanes          | 0.93  |
| 101 | 1-Ethyl-2-methylbenzene              | Aromatics        | 5.33  |
| 102 | Benzaldehyde                         | OVOCs            | -0.33 |
| 103 | 1,2,4-Trimethylbenzene               | Aromatics        | 7.88  |
| 104 | 1,3-Dichlorobenzene                  | Halohydrocarbons | –     |
| 105 | p-Dichlorobenzene                    | Halohydrocarbons | 0.20  |
| 106 | 1,2,3-Trimethylbenzene               | Aromatics        | 9.86  |
| 107 | Chlorotoluene                        | Halohydrocarbons | –     |
| 108 | 1,3-Diethylbenzene                   | Aromatics        | 6.30  |
| 109 | o-Dichlorobenzene                    | Halohydrocarbons | 0.20  |
| 110 | p-Diethylbenzene                     | Aromatics        | 4.18  |
| 111 | Undecane                             | Alkanes          | 0.85  |
| 112 | 3-Methylbenzaldehyde                 | OVOCs            | -0.29 |
| 113 | Dodecane                             | Alkanes          | 0.79  |
| 114 | 1,2,4-Trichlorobenzene               | Halohydrocarbons | –     |
| 115 | 1,1,2,3,4,4-Hexachloro-1,3-butadiene | Halohydrocarbons | –     |
| 116 | Naphthalene                          | Aromatics        | 3.13  |
| 117 | Formaldehyde                         | OVOCs            | 7.16  |
| 118 | Glyoxal                              | OVOCs            | 8.84  |
| 119 | Cyclohexanone                        | OVOCs            | 1.66  |
| 120 | Isovaleraldehyde                     | OVOCs            | 4.69  |
| 121 | p-Methylbenzaldehyde                 | OVOCs            | -0.29 |
| 122 | Methylglyoxal (Pyruvaldehyde)        | OVOCs            | 11.20 |
| 123 | 2,5-Dimethylbenzaldehyde             | OVOCs            | -0.26 |
| 124 | Heptanal                             | OVOCs            | 3.55  |
| 125 | Octanal                              | OVOCs            | 3.06  |
| 126 | Nonaldehyde                          | OVOCs            | –     |
| 127 | Decanal                              | OVOCs            | –     |

**Table S3. Source profile of aircraft emissions.**

| Numbers | Species                                | Chemical groups  | Concentration $\pm$ standard deviation ( $\mu\text{g m}^{-3}$ ) |
|---------|----------------------------------------|------------------|-----------------------------------------------------------------|
| 1       | Ethane                                 | Alkanes          | $1.45 \pm 0.24$                                                 |
| 2       | Ethylene                               | Alkenes          | $1.24 \pm 0.09$                                                 |
| 3       | Propane                                | Alkanes          | $6.13 \pm 0.41$                                                 |
| 4       | Difluorodichloromethane                | Halohydrocarbons | $2.42 \pm 0.03$                                                 |
| 5       | Acrylic                                | Alkenes          | $0.21 \pm 0.06$                                                 |
| 6       | Isobutane                              | Alkanes          | $1.6 \pm 0.37$                                                  |
| 7       | n-Butane                               | Alkanes          | $2.44 \pm 0.89$                                                 |
| 8       | Acetylene                              | Alkynes          | $1.28 \pm 0.07$                                                 |
| 9       | trans-2-Butene                         | Alkenes          | $0.05 \pm 0.02$                                                 |
| 10      | cis-2-Butene                           | Alkenes          | $0.28 \pm 0.06$                                                 |
| 11      | n-Butene                               | Alkenes          | $0.1 \pm 0.02$                                                  |
| 12      | 1,1,2,2-Tetrafluoro-1,2-dichloroethane | Halohydrocarbons | $0.76 \pm 0.06$                                                 |
| 13      | Methyl chloride                        | Halohydrocarbons | —                                                               |
| 14      | Vinyl Chloride                         | Halohydrocarbons | —                                                               |
| 15      | Butadiene                              | Alkenes          | $0.21 \pm 0.1$                                                  |
| 16      | Acetaldehyde                           | OVOCs            | $3.61 \pm 0.83$                                                 |
| 17      | Methyl bromide                         | Halohydrocarbons | $0.07 \pm 0$                                                    |
| 18      | Ethyl chloride                         | Halohydrocarbons | $0.05 \pm 0.02$                                                 |
| 19      | Isopentane                             | Alkanes          | $1.08 \pm 0.48$                                                 |
| 20      | Monofluorotrichloromethane             | Halohydrocarbons | $1.01 \pm 0.24$                                                 |
| 21      | 1-Pentene                              | Alkenes          | $0.06 \pm 0.02$                                                 |
| 22      | n-Pentane                              | Alkanes          | $1.24 \pm 0.52$                                                 |
| 23      | trans-2-Pentene                        | Alkenes          | $0.09 \pm 0.05$                                                 |
| 24      | Isoprene                               | Alkenes          | $0.61 \pm 0.33$                                                 |
| 25      | cis-2-Pentene                          | Alkenes          | $0.01 \pm 0$                                                    |
| 26      | Ethanol                                | OVOCs            | $1.76 \pm 1.12$                                                 |
| 27      | Acrolein                               | OVOCs            | $0.14 \pm 0.04$                                                 |
| 28      | Propionaldehyde                        | OVOCs            | $24.44 \pm 6.87$                                                |
| 29      | 1,1-Dichloroethylene                   | Halohydrocarbons | $0.01 \pm 0$                                                    |
| 30      | 1,2,2-Trifluoro-1,1,2-trichloroethane  | Halohydrocarbons | $0.75 \pm 0.02$                                                 |
| 31      | 2,2-Dimethylbutane                     | Alkanes          | $0.13 \pm 0.05$                                                 |
| 32      | Acetone                                | OVOCs            | $19.47 \pm 5.47$                                                |
| 33      | Carbon disulfide                       | Organic sulfur   | —                                                               |
| 34      | Isopropyl alcohol                      | OVOCs            | $2.23 \pm 1.42$                                                 |
| 35      | Dichloromethane                        | Halohydrocarbons | $12.66 \pm 2.84$                                                |
| 36      | 2,3-Dimethylbutane                     | Alkanes          | $0.2 \pm 0.06$                                                  |
| 37      | 2-Methylpentane                        | Alkanes          | $0.89 \pm 0.3$                                                  |
| 38      | Cyclopentane                           | Alkanes          | $0.2 \pm 0.05$                                                  |
| 39      | trans-1,2-Dichloroethylene             | Halohydrocarbons | $0.01 \pm 0.01$                                                 |
| 40      | 3-Methylpentane                        | Alkanes          | $0.37 \pm 0.14$                                                 |
| 41      | Methyl tert-butyl ether                | OVOCs            | $0.28 \pm 0.07$                                                 |
| 42      | 1-Hexene                               | Alkenes          | $0.03 \pm 0$                                                    |

| Numbers | Species                      | Chemical groups  | Concentration $\pm$ standard deviation ( $\mu\text{g m}^{-3}$ ) |
|---------|------------------------------|------------------|-----------------------------------------------------------------|
| 43      | n-Hexane                     | Alkanes          | $1.97 \pm 0.63$                                                 |
| 44      | Methacrolein                 | OVOCs            | $0.19 \pm 0.11$                                                 |
| 45      | 1,1-Dichloroethane           | Halohydrocarbons | $0.07 \pm 0.02$                                                 |
| 46      | Vinyl acetate                | OVOCs            | $0.02 \pm 0.01$                                                 |
| 47      | 2,4-Dimethylpentane          | Alkanes          | $4.01 \pm 1.4$                                                  |
| 48      | n-Butyraldehyde              | OVOCs            | $0.82 \pm 0.35$                                                 |
| 49      | Methylcyclopentane           | Alkanes          | $0.16 \pm 0.06$                                                 |
| 50      | cis-1,2-dichloroethylene     | Halohydrocarbons | $0.01 \pm 0$                                                    |
| 51      | 2-Butanone                   | OVOCs            | $3.46 \pm 1.45$                                                 |
| 52      | Ethyl acetate                | OVOCs            | $7.13 \pm 3.72$                                                 |
| 53      | Chloroform                   | Halohydrocarbons | $4.55 \pm 1.91$                                                 |
| 54      | Tetrahydrofuran              | OVOCs            | $0.12 \pm 0.07$                                                 |
| 55      | 1,1,1-Trichloroethane        | Halohydrocarbons | $0.01 \pm 0$                                                    |
| 56      | 2-Methylhexane               | Alkanes          | $0.23 \pm 0.11$                                                 |
| 57      | Cyclohexane                  | Alkanes          | $0.12 \pm 0.06$                                                 |
| 58      | 2,3-Dimethylpentane          | Alkanes          | $0.19 \pm 0.1$                                                  |
| 59      | Carbon tetrachloride         | Halohydrocarbons | $0.65 \pm 0.02$                                                 |
| 60      | 3-Methylhexane               | Alkanes          | $0.2 \pm 0.13$                                                  |
| 61      | Benzene                      | Aromatics        | $1.3 \pm 0.15$                                                  |
| 62      | 1,2-Dichloroethane           | Halohydrocarbons | $7.61 \pm 1.22$                                                 |
| 63      | 2,2,4-Trimethylpentane       | Alkanes          | $0.18 \pm 0.06$                                                 |
| 64      | n-Heptane                    | Alkanes          | $0.42 \pm 0.25$                                                 |
| 65      | Crotonaldehyde               | OVOCs            | $0.31 \pm 0.18$                                                 |
| 66      | Trichlorethylene             | Halohydrocarbons | $0.17 \pm 0.1$                                                  |
| 67      | Methylcyclohexane            | Alkanes          | $0.08 \pm 0.04$                                                 |
| 68      | 1,2-Dichloropropane          | Halohydrocarbons | $0.8 \pm 0.1$                                                   |
| 69      | Valeraldehyde                | OVOCs            | $0.34 \pm 0.09$                                                 |
| 70      | Methyl methacrylate          | OVOCs            | $0.06 \pm 0.03$                                                 |
| 71      | 1,4-Dioxane                  | OVOCs            | $0.01 \pm 0$                                                    |
| 72      | Bromodichloromethane         | Halohydrocarbons | $0.03 \pm 0$                                                    |
| 73      | 2,3,4-Trimethylpentane       | Alkanes          | $0.04 \pm 0.02$                                                 |
| 74      | 2-Methylheptane              | Alkanes          | $0.03 \pm 0.01$                                                 |
| 75      | trans-1,3-Dichloro-1-propene | Halohydrocarbons | $0.01 \pm 0.01$                                                 |
| 76      | 3-Methylheptane              | Alkanes          | $0.03 \pm 0.01$                                                 |
| 77      | 4-Methyl-2-pentanone         | OVOCs            | $0.26 \pm 0.14$                                                 |
| 78      | Toluene                      | Aromatics        | $3 \pm 1.56$                                                    |
| 79      | n-Octane                     | Alkanes          | $0.07 \pm 0.02$                                                 |
| 80      | cis-1,3-Dichloro-1-propene   | Halohydrocarbons | $0.01 \pm 0.01$                                                 |
| 81      | 1,1,2-Trichloroethane        | Halohydrocarbons | $0.11 \pm 0.03$                                                 |
| 82      | Tetrachlorethylene           | Halohydrocarbons | $0.27 \pm 0.15$                                                 |
| 83      | 2-Hexanone                   | OVOCs            | $1.38 \pm 0.24$                                                 |
| 84      | Dibromochloromethane         | Halohydrocarbons | $0.03 \pm 0.01$                                                 |
| 85      | Hexanal                      | OVOCs            | $1.14 \pm 0.25$                                                 |
| 86      | 1,2-Dibromoethane            | Halohydrocarbons | $0.03 \pm 0.02$                                                 |

| Numbers | Species                              | Chemical groups  | Concentration $\pm$ standard deviation ( $\mu\text{g m}^{-3}$ ) |
|---------|--------------------------------------|------------------|-----------------------------------------------------------------|
| 87      | Chlorobenzene                        | Halohydrocarbons | $0.05 \pm 0.02$                                                 |
| 88      | Ethylbenzene                         | Aromatics        | $0.43 \pm 0.1$                                                  |
| 89      | m/p-Xylene                           | Aromatics        | $1.11 \pm 0.35$                                                 |
| 90      | n-Nonane                             | Alkanes          | $0.05 \pm 0$                                                    |
| 91      | o-Xylene                             | Aromatics        | $0.4 \pm 0.11$                                                  |
| 92      | Styrene                              | Aromatics        | $0.08 \pm 0.02$                                                 |
| 93      | Bromoform                            | Halohydrocarbons | $0.07 \pm 0.03$                                                 |
| 94      | Cumene                               | Aromatics        | $0.02 \pm 0$                                                    |
| 95      | Symmetric tetrachloroethane          | Halohydrocarbons | $0.05 \pm 0.03$                                                 |
| 96      | n-Propylbenzene                      | Aromatics        | $0.04 \pm 0.02$                                                 |
| 97      | 1-Ethyl-3-methylbenzene              | Aromatics        | $0.09 \pm 0.07$                                                 |
| 98      | p-Ethyltoluene                       | Aromatics        | $0.05 \pm 0.04$                                                 |
| 99      | 1,3,5-Trimethylbenzene               | Aromatics        | $0.04 \pm 0.03$                                                 |
| 100     | Decane                               | Alkanes          | $0.04 \pm 0.01$                                                 |
| 101     | 1-Ethyl-2-methylbenzene              | Aromatics        | $0.05 \pm 0.03$                                                 |
| 102     | Benzaldehyde                         | OVOCs            | $0.23 \pm 0.04$                                                 |
| 103     | 1,2,4-Trimethylbenzene               | Aromatics        | $0.15 \pm 0.03$                                                 |
| 104     | 1,3-Dichlorobenzene                  | Halohydrocarbons | $0.05 \pm 0.03$                                                 |
| 105     | p-Dichlorobenzene                    | Halohydrocarbons | $0.07 \pm 0.04$                                                 |
| 106     | 1,2,3-Trimethylbenzene               | Aromatics        | $0.05 \pm 0.04$                                                 |
| 107     | Chlorotoluene                        | Halohydrocarbons | $0.03 \pm 0.02$                                                 |
| 108     | 1,3-Diethylbenzene                   | Aromatics        | $0.02 \pm 0.01$                                                 |
| 109     | o-Dichlorobenzene                    | Halohydrocarbons | $0.05 \pm 0.03$                                                 |
| 110     | p-Diethylbenzene                     | Aromatics        | $0.02 \pm 0.01$                                                 |
| 111     | Undecane                             | Alkanes          | —                                                               |
| 112     | 3-Methylbenzaldehyde                 | OVOCs            | —                                                               |
| 113     | Dodecane                             | Alkanes          | —                                                               |
| 114     | 1,2,4-Trichlorobenzene               | Halohydrocarbons | —                                                               |
| 115     | 1,1,2,3,4,4-Hexachloro-1,3-butadiene | Halohydrocarbons | —                                                               |
| 116     | Naphthalene                          | Aromatics        | —                                                               |
| 117     | Formaldehyde                         | OVOCs            | $6.37 \pm 1.24$                                                 |
| 118     | Glyoxal                              | OVOCs            | $1.82 \pm 0.26$                                                 |
| 119     | Cyclohexanone                        | OVOCs            | $1.25 \pm 0.77$                                                 |
| 120     | Isovaleraldehyde                     | OVOCs            | $0.81 \pm 0.13$                                                 |
| 121     | p-Methylbenzaldehyde                 | OVOCs            | —                                                               |
| 122     | Methylglyoxal<br>(Pyrualdehyde)      | OVOCs            | $1.82 \pm 0.34$                                                 |
| 123     | 2,5-Dimethylbenzaldehyde             | OVOCs            | 0.78                                                            |
| 124     | Heptanal                             | OVOCs            | $3.79 \pm 0.49$                                                 |
| 125     | Octanal                              | OVOCs            | $1.55 \pm 0.74$                                                 |
| 126     | Nonaldehyde                          | OVOCs            | $3.93 \pm 1.05$                                                 |
| 127     | Decanal                              | OVOCs            | $3.81 \pm 1.01$                                                 |
